# Supplementary material for: Nickel nanoparticle decorated N-doped carbon nanofibers for light weight and high-efficiency microwave absorption
Source: Royal Society of Chemistry journal article supplement (doi:10.1039/d2dt02076a), 2022-01-01
Supplement: d2dt02076a1.pdf [file d2dt02076a1.pdf]

### Supplementary Information

#### **Nickel nanoparticles decorated in N-doped carbon nanofibers for lightweight and high-efficiency microwave absorption**

Liang Yan <sup>a</sup>, Haoyan Zhang <sup>a</sup>, Yao Li <sup>a</sup>, Jun Xiang <sup>a,\*</sup>, Kaiyin Zhang <sup>b,\*\*</sup>

<sup>a</sup> School of Science, Jiangsu University of Science and Technology, Zhenjiang 212100, PR China

<sup>b</sup> College of mechanical and electrical engineering, Wuyi University, Wuyishan 354300, PR China

\*Corresponding author.

\*\*Corresponding author.

E-mail addresses: [jxiang@just.edu.cn](mailto:jxiang@just.edu.cn) (J. Xiang), [zhangkaiyin@wuyiu.edu.cn](mailto:zhangkaiyin@wuyiu.edu.cn) (K. Zhang).

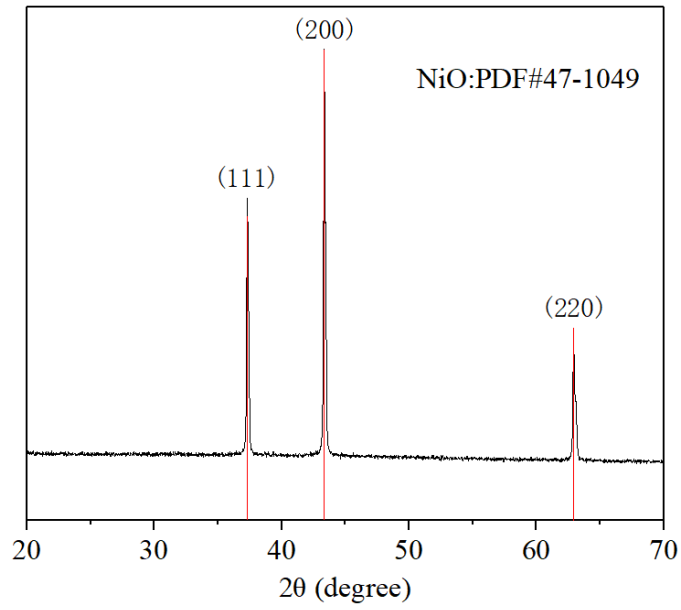

**Fig. S1** XRD pattern of the final product after the calcination.

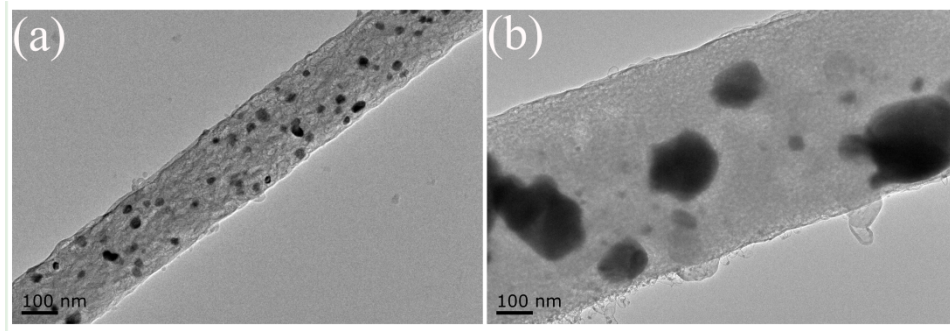

**Fig. S2** highly magnified TEM images of (a) S1 and (b) S3.

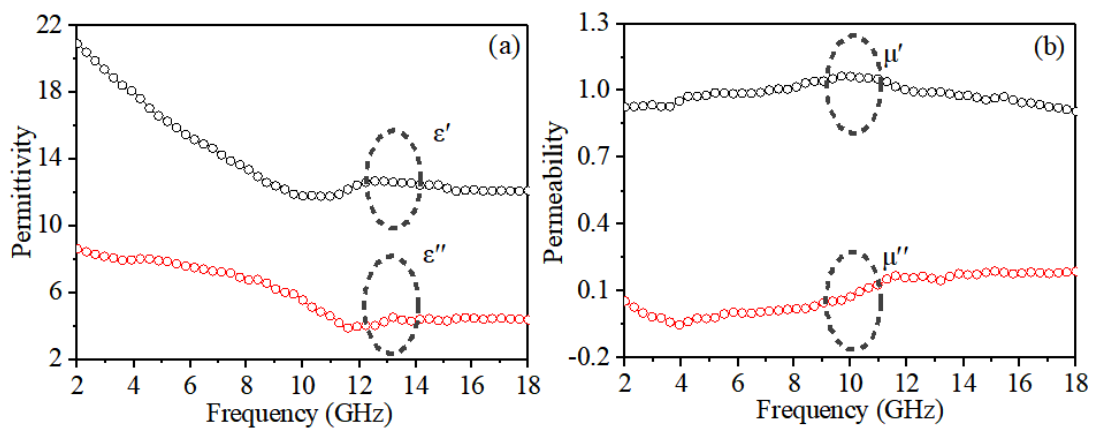

**Fig. S3** (a) complex permittivity and (b) complex permeability of S0.

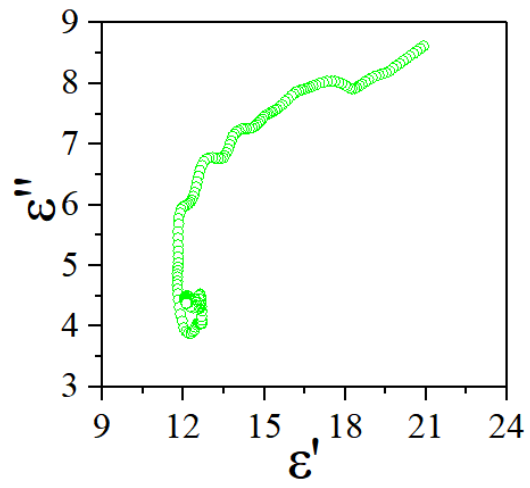

**Fig. S4** Cole-Cole plot of S0.
